# Supplementary material for: Long Noncoding RNA LINC00460 Promotes Cell Progression by Sponging miR-4443 in Head and Neck Squamous Cell Carcinoma
Source: PubMed Central journal article supplement — Cell Transplant. 2020 Jun 1;29:0963689720927405. doi: 10.1177/0963689720927405 (PMC7563806; doi:10.1177/0963689720927405), 2020-06-01
Supplement: Supplementary_Table_1.pdf [file Supplementary_Table_1.pdf]

**Supplementary Table 1. Sequences of siRNA , miR-4443 mimic and miR-4443 inhibitor**

| <b>Name</b>        | <b>Sequence</b>                 |
|--------------------|---------------------------------|
| si-LINC00460       | 5'-GCAAUUGCUGGAAUCACUUTT-3'     |
| si-NC              | 5'-UUCUCCGAACGUGUCACGUTT-3'     |
| miR-4443 mimics    | 5'-UUGGAGGCGUGGGUUUU-3'         |
| Mimics NC          | 5'-UUGUACUACACAAAAGUACUGdTdT-3' |
| miR-4443 inhibitor | 5'-AAAACCCACGCCUCCAA-3'         |
| Inhibitor NC       | 5'-CAGUACUUUUGUGUAGUACAA-3'     |

NC, negative control.
